# Supplementary material for: Novel Flower-like Nickel Sulfide as an Efficient Electrocatalyst for Non-aqueous Lithium-Air Batteries
Source: PubMed Central journal article supplement (PMC4677382; doi:10.1038/srep18199), 2015-12-14
Supplement: srep18199-s1.pdf [file srep18199-s1.pdf]

## Supplementary Information

### Novel Flower-like Nickel Sulfide as an Efficient Electrocatalyst for Non-aqueous Lithium-Air Batteries

Zhong Ma<sup>1</sup>, Xianxia Yuan<sup>1,\*</sup>, Zhenlin Zhang<sup>1</sup>, Delong Mei<sup>1</sup>, Lin Li<sup>1</sup>, Zi-Feng Ma<sup>1</sup>, Lei Zhang<sup>2</sup>, Jun Yang<sup>1</sup>, Jiuju Zhang<sup>2</sup>

<sup>1</sup>Department of Chemical Engineering, Shanghai Jiao Tong University, Shanghai, 200240, China

<sup>2</sup> NRC Energy, Mining & Environment Portfolio, National Research Council Canada, Vancouver, BC V6T 1W5,  
Canada

\*Corresponding authors: [yuanxx@sjtu.edu.cn](mailto:yuanxx@sjtu.edu.cn) (X. Yuan)

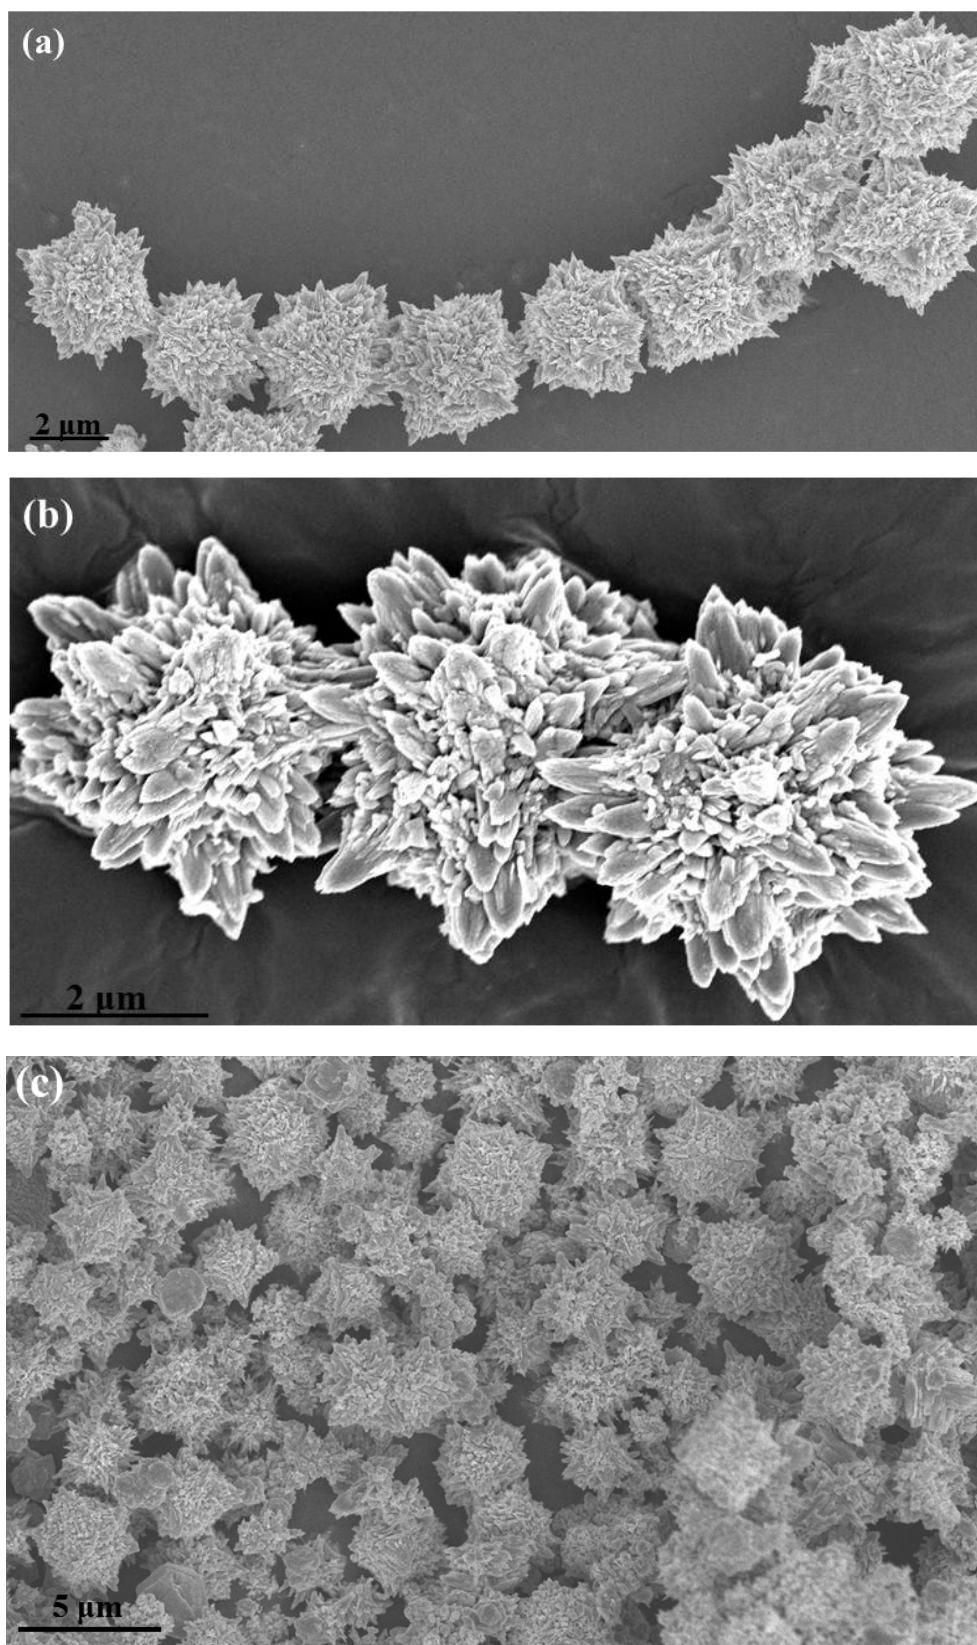

**Figure S1** SEM images of the as-prepared f-NiS catalysts

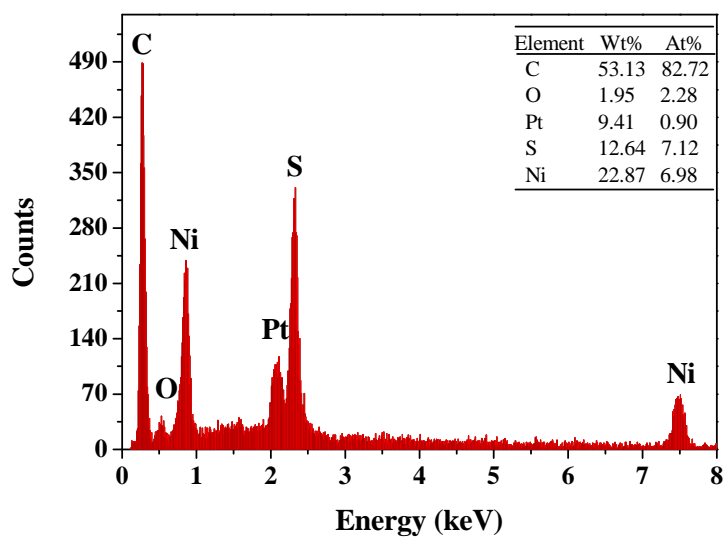

**Figure S2** EDX of the as-prepared f-NiS catalyst

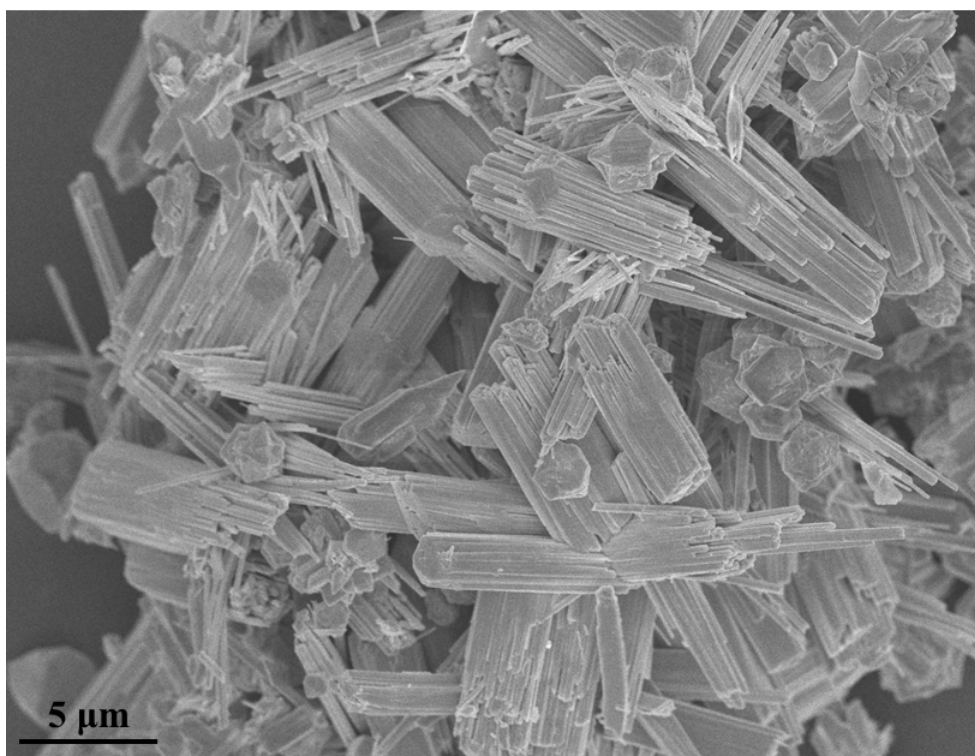

**Figure S3** SEM images of the as-prepared r-NiS catalysts

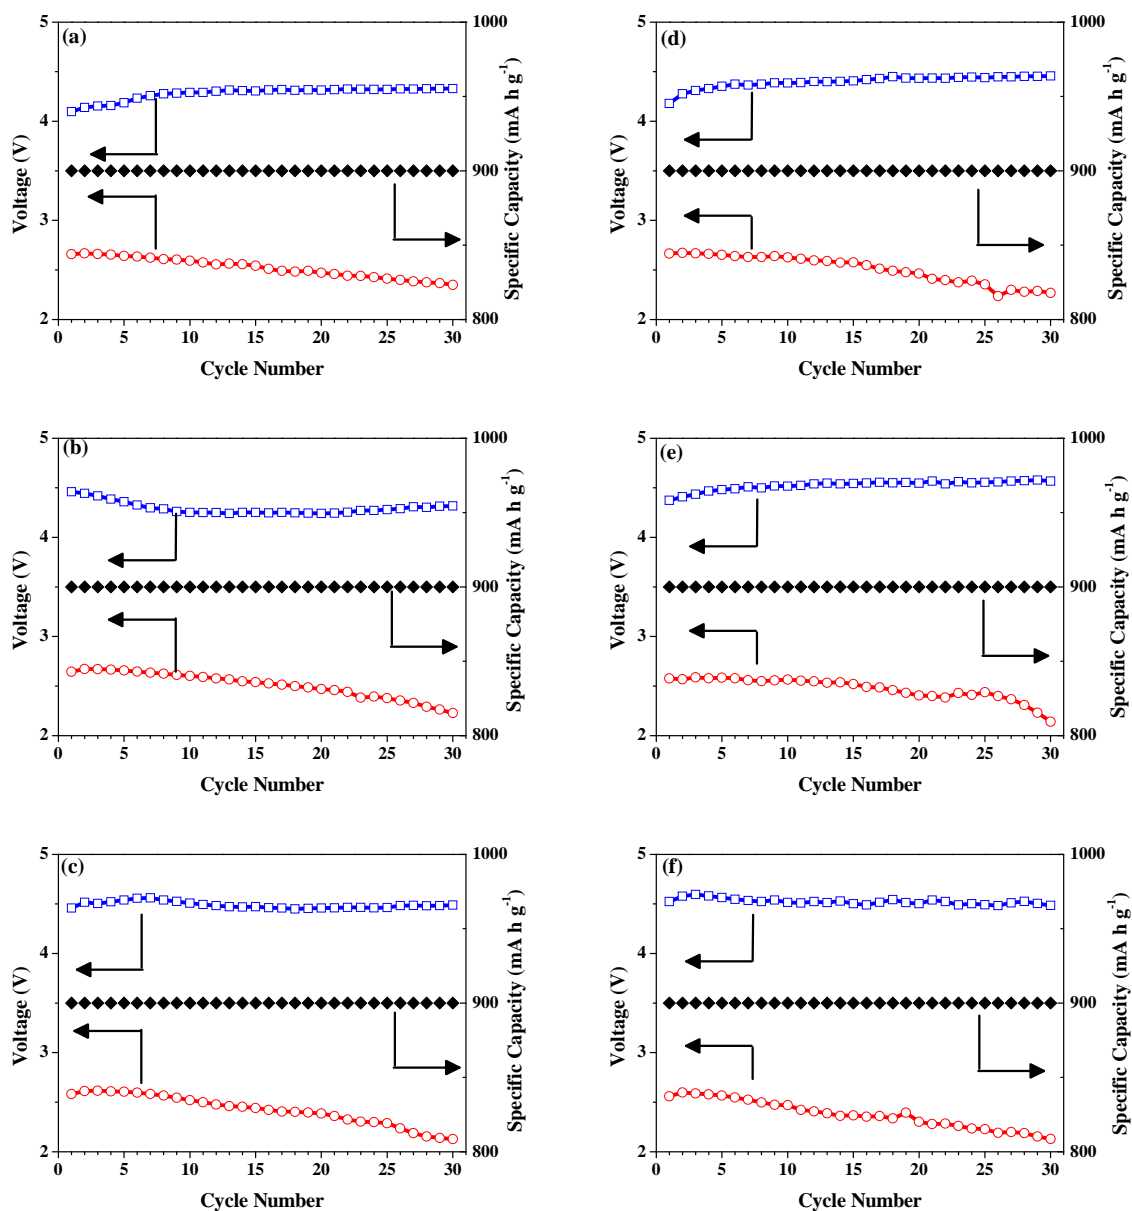

**Figure S4** Terminal voltages versus cycle number for f-NiS (a, b, c) and r-NiS (d, e, f) based electrodes with a controlled capacity of 900 mA h g<sup>-1</sup> at various current densities (75 (a, d), 150 (b, e) and 200 (c, f) mA g<sup>-1</sup>)

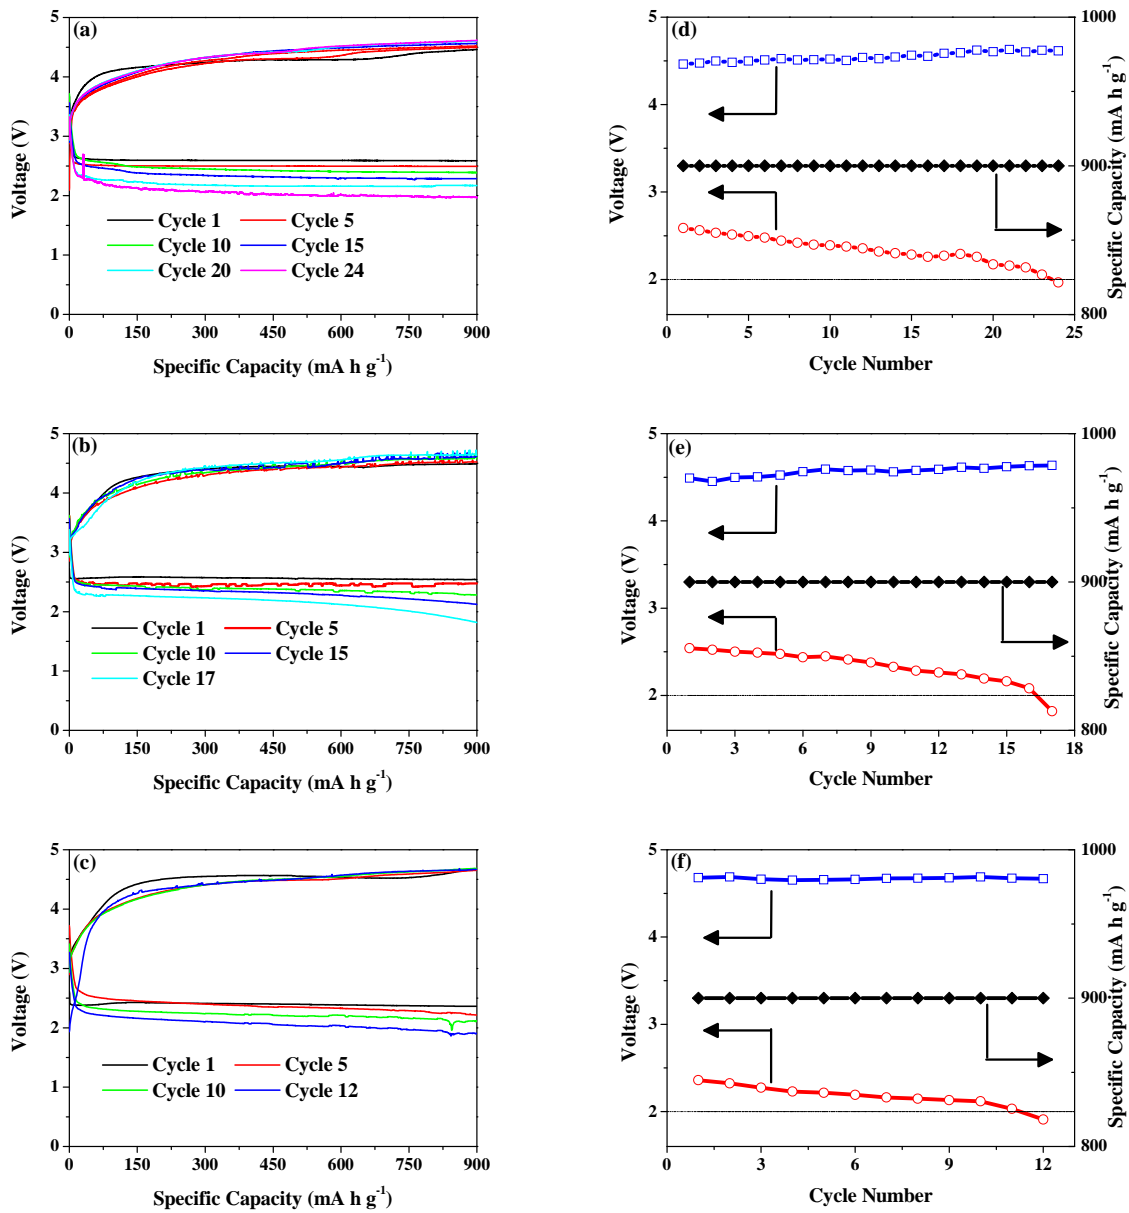

**Figure S5** Discharge-charge profiles and terminal voltages of LABs with pure Super P cathode versus cycle number at various current densities (75 (a, d), 150 (b, e) and 200 (c, f) mA g<sup>-1</sup>)

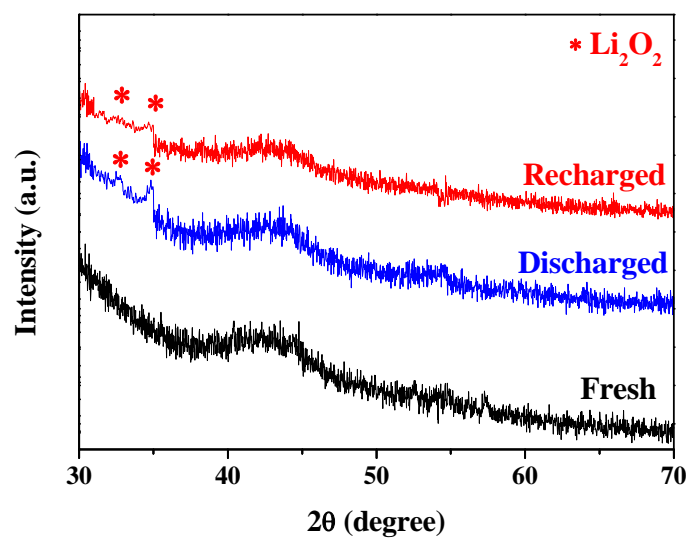

**Figure S6** XRD patterns of fresh, discharged and recharged pure Super P based cathodes

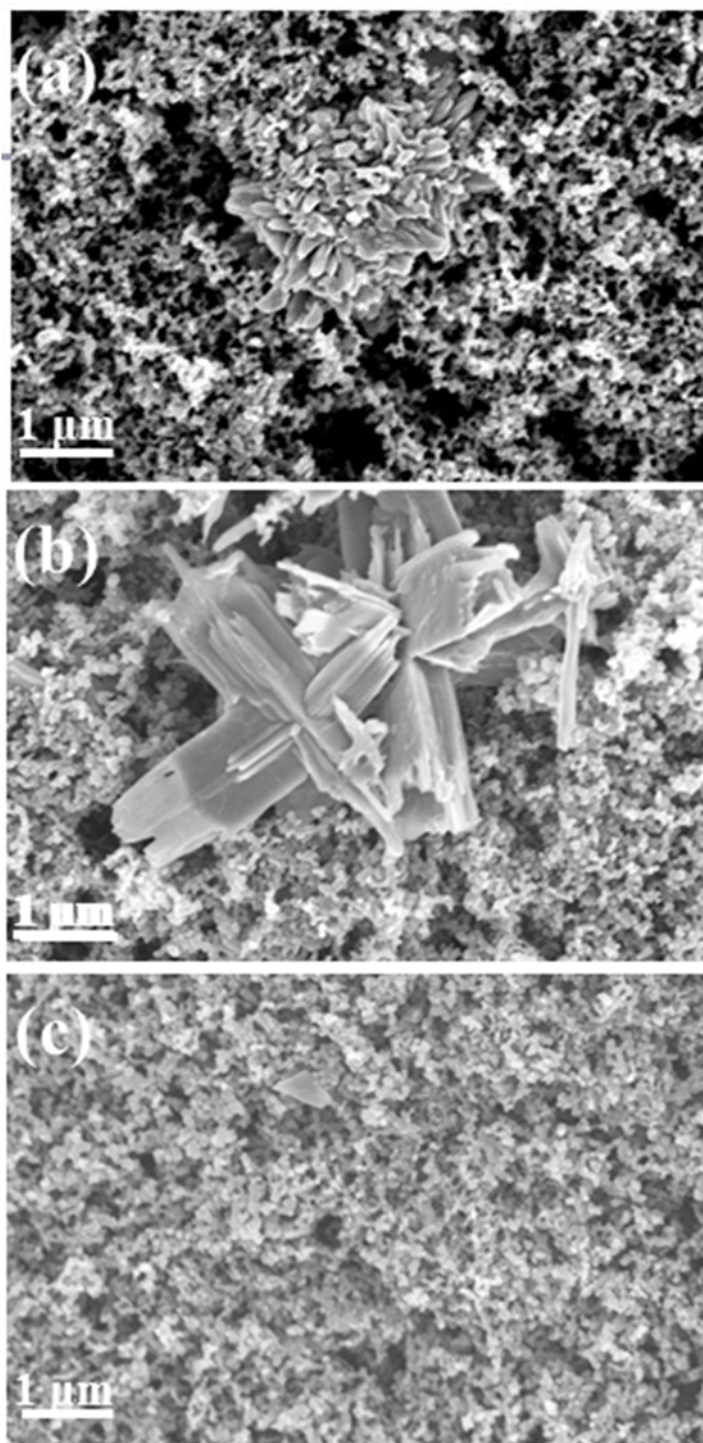

**Figure S7** SEM images of fresh electrodes: f-NiS (a), r-NiS (b) and Super P (c)

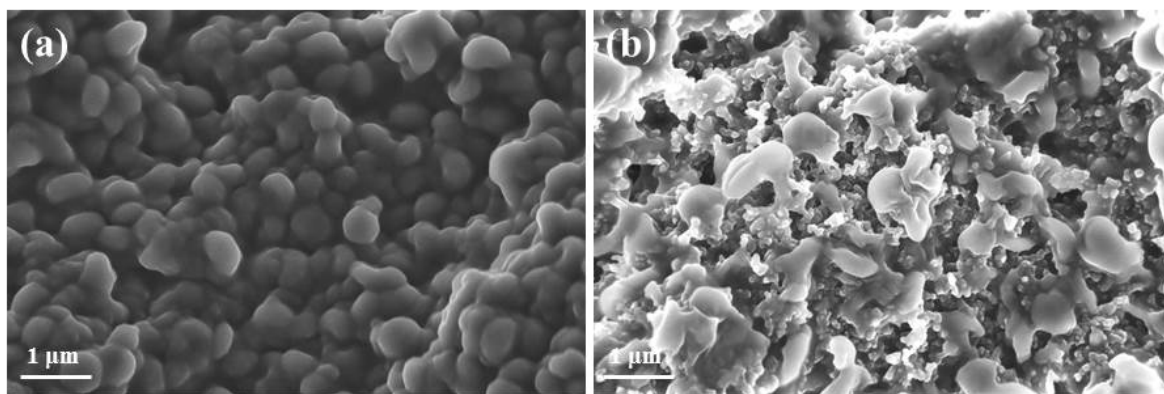

**Figure S8** SEM images of pure Super P based cathodes: discharged (a) and recharged (b).
